# Supplementary material for: Chemical Treatment-Induced Indirect-to-Direct Bandgap Transition in MoS₂: Impact on Excitonic Emission
Source: Research Square preprint supplement (doi:10.21203/rs.3.rs-7212840/v1), 2025-08-04
Supplement: Supplementary file 1 [file 1f392dc871fbd105918b4dc8.docx]

# **Supplemental Material for**

# **Chemical Treatment-Induced Indirect-to-Direct Bandgap Transition in MoS₂: Impact on Excitonic Emission**

## Yusuf Kerem Bostan1, Elanur Hut1, Cem Sanga2, Nadire Nayir2,3, Ayse Erol1, Yue Wang4 *, and Fahrettin Sarcan1,4 *

## 1Department of Physics, Faculty of Science, Istanbul University, Vezneciler, Istanbul, 34134, Turkey

## 2Department of Physics Engineering, Istanbul Technical University, Maslak, Istanbul, 34467, Turkey

## 3Paul-Drude-Institute for Solid State Electronics, Leibniz Institute within Forschungsverbund Berlin eV., Hausvogteiplatz 5-7, 10117 Berlin, Germany

## 4School of Physics, Engineering and Technology, University of York, York, YO10 5DD, United Kingdom


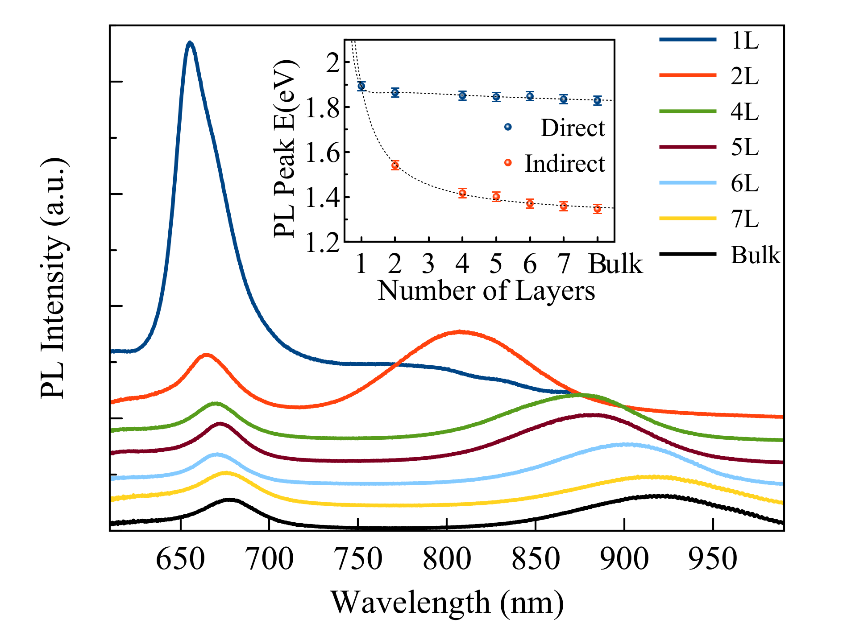


**Figure S1**. PL spectra of MoS2 flakes with different numbers of layers, from monolayer to bulk. The inset shows the bandgap energy of each layer extracted from PL peaks.

The output characteristics show that the drain current increased up to 1.5 µA under a 1 V negative drain bias across a 3 µm channel length at 0 V gate voltage (Figure S2b). According to the transfer characteristics of the 3 µm channel device, Ion/Ioff ratio of the pristine FET is 2 orders of magnitude and is improved to 6 orders of magnitude after 12 hours of treatment (Figure S2c). The pristine sample exhibits n-type characteristics, which are enhanced after 12 hours in DCE solution.


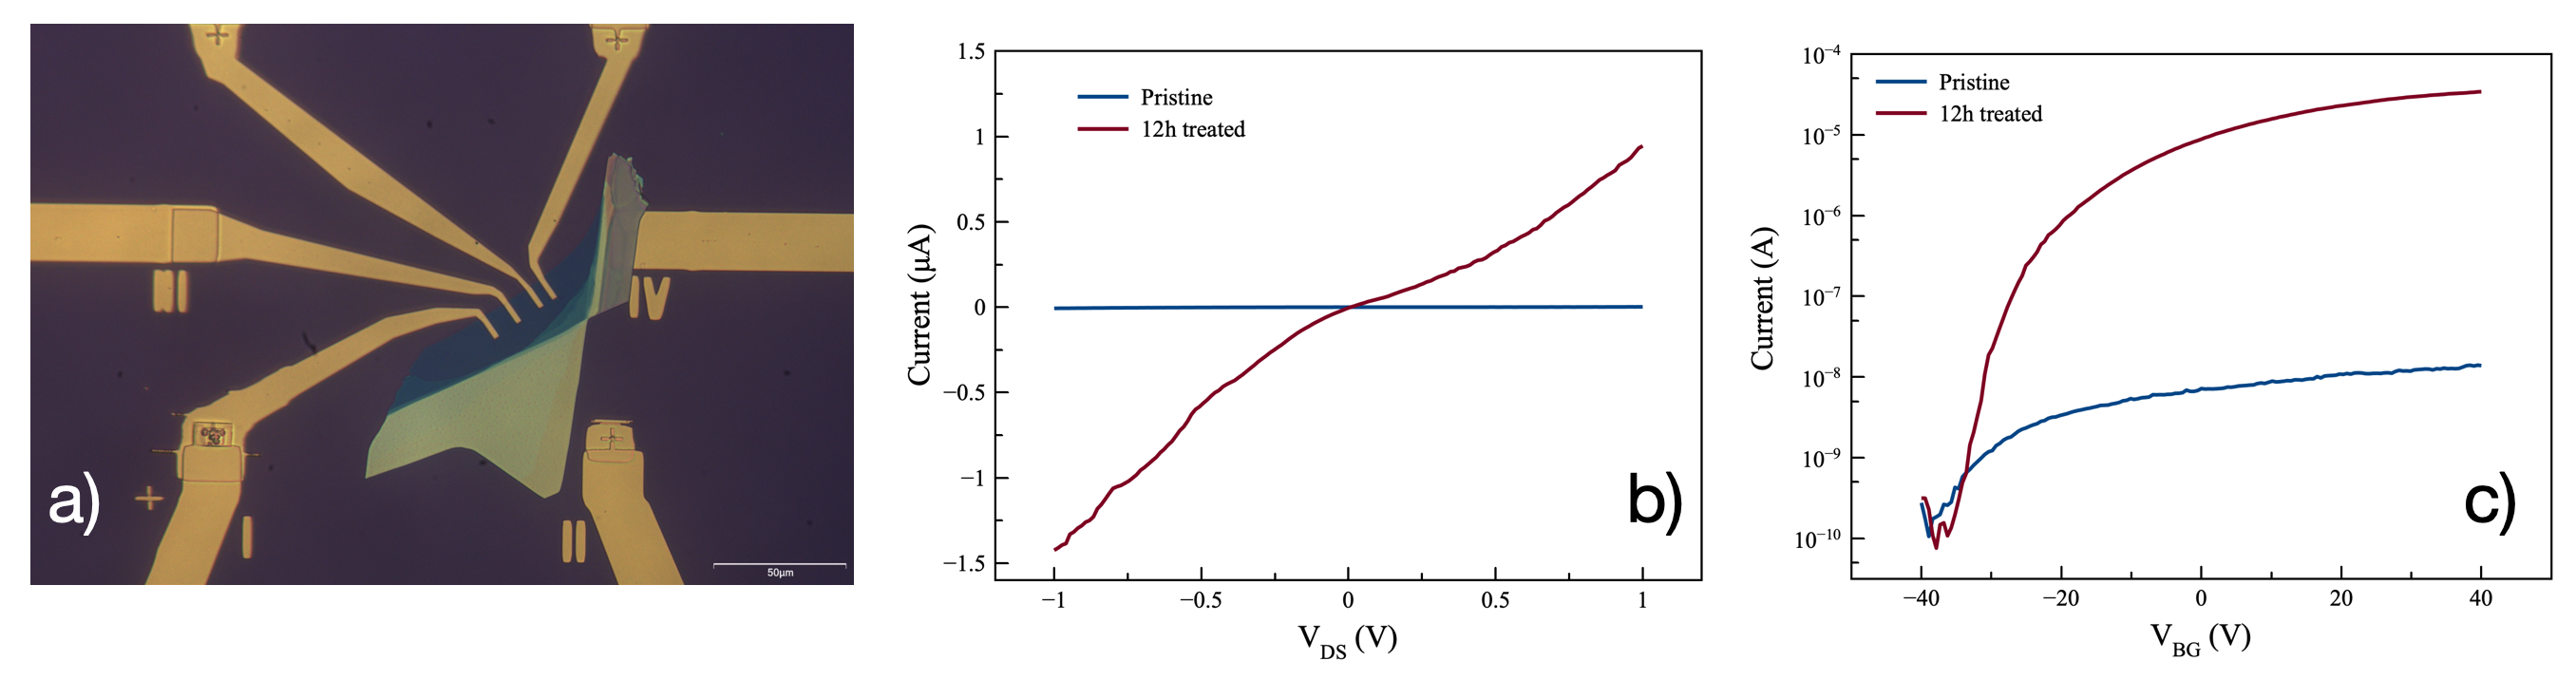


**Figure S2**. **a)** Optical microscope images of a few-layer MoS2 FET device**, b)** output and **c)** transfer characteristics of the FET device before and after DCE treatment.
